# Supplementary material for: Clinical usefulness of the metabolic syndrome for the risk of coronary heart disease does not exceed the sum of its individual components in older men and women. The Three-City (3C) Study
Source: HighWire-hosted journal article supplement (doi:10.1136/heartjnl-2011-301185), 2012-04-14
Supplement: heartjnl-2011-301185-s1.pdf [file heartjnl-2011-301185-s1.pdf]

**Supplemental Figure 1. Flow Chart of the Study Population. The Three-City Study**

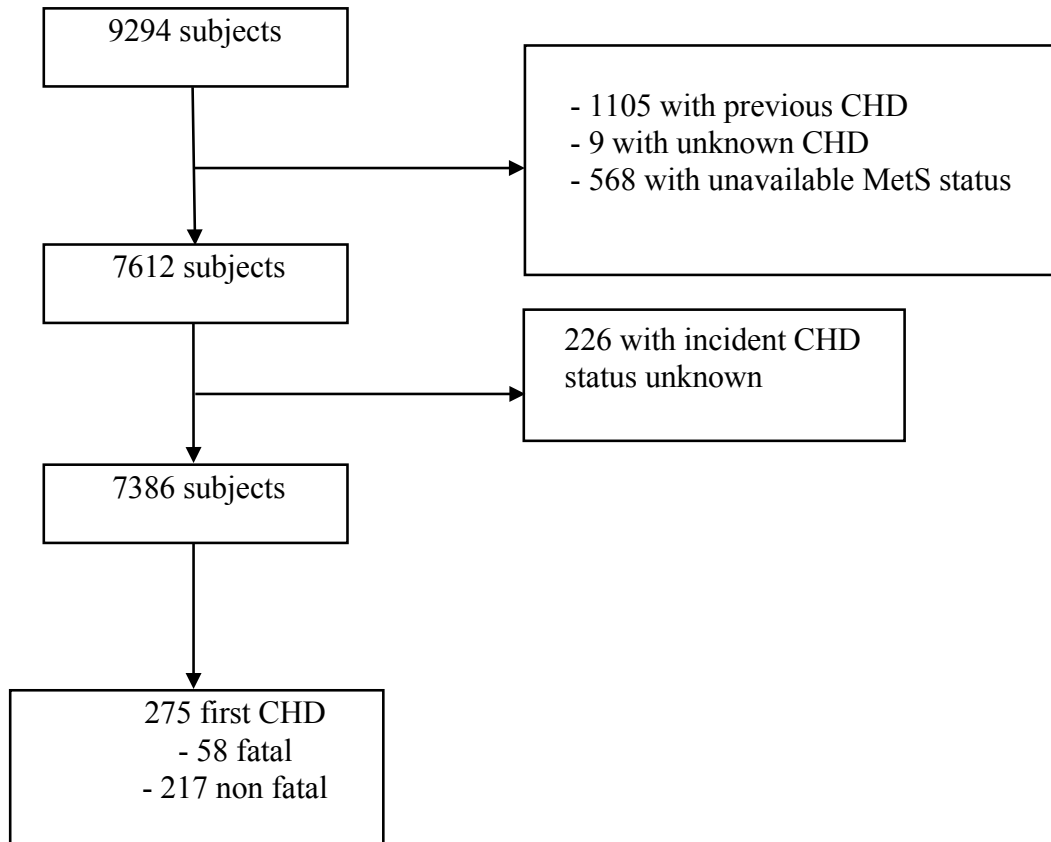

**Supplemental figure 2. Age and study center adjusted cumulative hazard of CHD by baseline MetS status in males and females. The Three-City Study.**

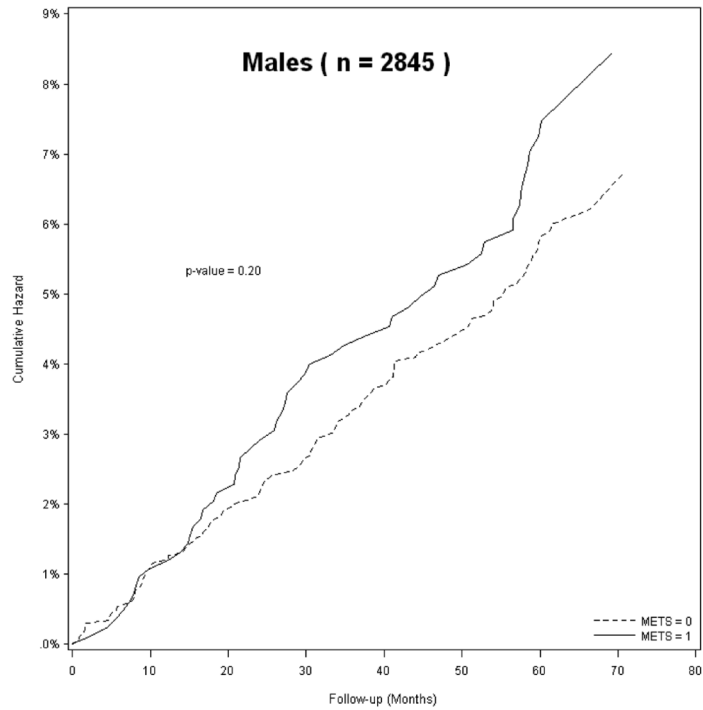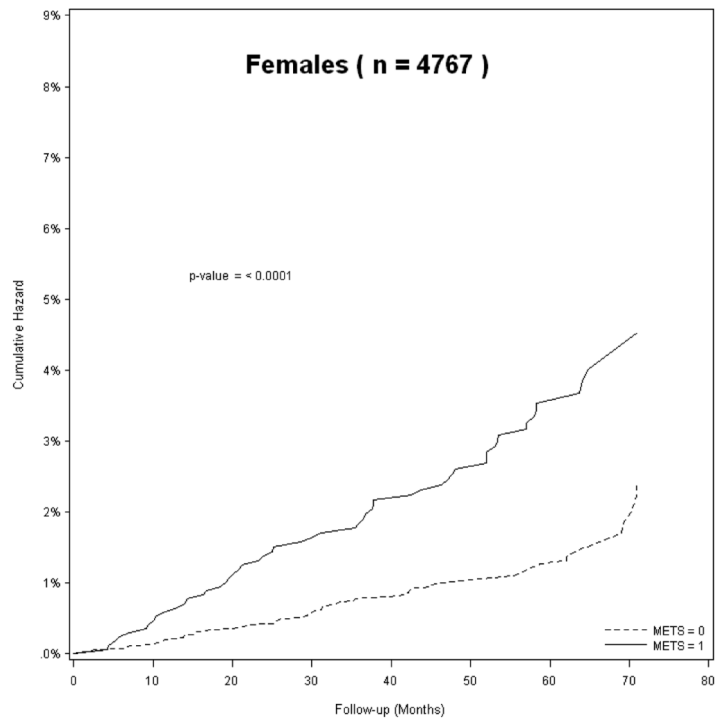

**Supplemental table 1. Prevalence and hazard ratios for CHD by MetS definition. The Three-City Study.**

| MetS definition           |                        | Total cohort     | Women            | Men              |
|---------------------------|------------------------|------------------|------------------|------------------|
| 2005 revised NCEP ATP III | Prevalence of the MetS | 29.2%            | 29.4%            | 28.9%            |
|                           | HR (95% CI)            | 1.78 (1.39-2.28) | 2.56 (1.75-3.75) | 1.39 (0.99-1.94) |
| IDF                       | Prevalence of the MetS | 28.6%            | 28.0%            | 29.7%            |
|                           | HR (95% CI)            | 1.68 (1.30-2.16) | 2.18 (1.46-3.24) | 1.42 (1.02-1.98) |
| 2001 NCEP ATP III         | Prevalence of the MetS | 14.2%            | 14.1%            | 14.4%            |
|                           | HR (95% CI)            | 2.18 (1.66-2.87) | 3.26 (2.18-4.87) | 1.60 (1.08-2.38) |

Abbreviations: MetS, Metabolic syndrome; CHD, coronary heart disease.

Hazard Ratios were estimated by Cox proportional hazard models adjusted for age, study center, educational level, living alone, incapacity in instrumental activity of daily living, smoking status, LDL cholesterol, statin treatment and gender.
